# Supplementary material for: Hierarchical FeNi3 assemblies with caltrop-like architectures: synthesis, formation mechanism and magnetic properties
Source: Royal Society of Chemistry journal article supplement (doi:10.1039/c2ce06679c), 2012-01-01
Supplement: c2ce06679c.pdf [file c2ce06679c.pdf]

## Supporting Information

### Hierarchical FeNi<sub>3</sub> assemblies with caltrop-like architectures: synthesis, formation mechanism, and magnetic properties

Xuegang Lu,<sup>\*a</sup> Ge Huo,<sup>a</sup> Xiaolong Liu,<sup>b</sup> Gongying Liang,<sup>\*a</sup> Zijian Han,<sup>a</sup> and Xiaoping Song<sup>a</sup>

a. MOE Key Laboratory for Non-equilibrium Synthesis and Modulation of Condensed Matter. School of Science, Xi'an Jiaotong University, Xi'an 710049, China.

b. Tarim Oil-gas Transmitting Branch, Western Pipeline Project of Sino Petroleum Corporation

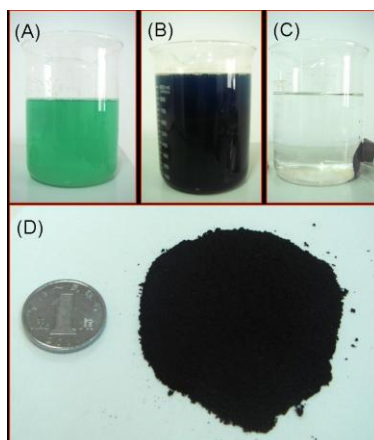

Fig. S1 Photographs of reaction solution at different stages: (A) Original aqueous solution of mixed NiCl<sub>2</sub> and FeCl<sub>2</sub> before reduction reaction, (B) At the beginning stage of reaction, (C) After the reaction, (D) Final products produced from 28.5 g NiCl<sub>2</sub>·6H<sub>2</sub>O and 8.0 g FeCl<sub>2</sub>·4H<sub>2</sub>O.

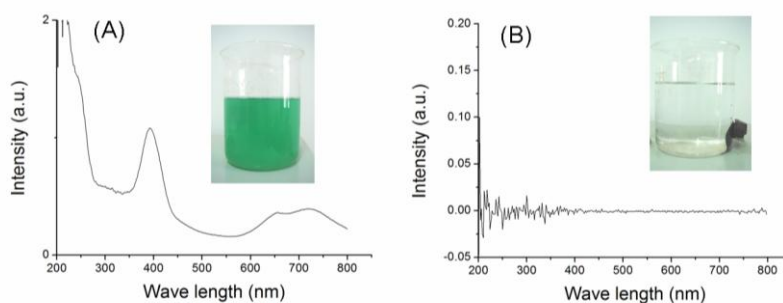

Fig. S2 UV-spectra of solutions: (a) before reaction, (b) after reaction.

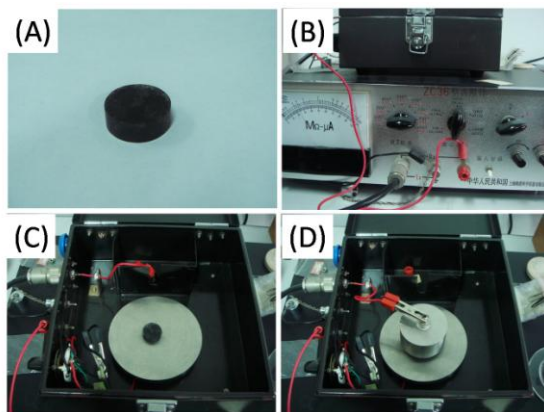

Fig. S3 (A) FeNi<sub>3</sub>/wax composite sample; (B) High resistivity meter; (C) Sample placed on the bottom electrode; (D) Measuring the resistivity.
